# Supplementary material
Source: publisher figshare collection journal article supplement (https://karger.figshare.com/ndownloader/files/15630452)
Supplement: Supplementary file 1 [file 15630452]

**Supplementary Table 1**. Quality assessment of the studies included in the systematic review according to the QUADAS-2 tool

| Author, year | Patient Selection | |  | Index test | |  | Reference standard | |  | Flow and timing | Score |
| --- | --- | --- | --- | --- | --- | --- | --- | --- | --- | --- | --- |
| Risk of bias | Applicability concerns |  | Risk of bias | Applicability concerns |  | Risk of bias | Applicability concerns |  | Risk of bias |
| Parving, 1992 [21] | High | Low |  | Low | Low |  | Low | Low |  | High | 5 |
| John, 1994 [62] | Unclear | High |  | Low | Low |  | Unclear | Low |  | High | 3 |
| Fioretto, 1996 [22] | Low | Low |  | Low | Low |  | Unclear | Low |  | Low | 6 |
| Olsen, 1996 [23] | Low | Low |  | Low | Unclear |  | Unclear | Low |  | Low | 5 |
| Brocco, 1997 [24] | Low | Low |  | Low | Low |  | Unclear | Low |  | Low | 6 |
| Mak, 1997 [48] | Low | Low |  | Low | Low |  | Unclear | Low |  | Low | 6 |
| Lee, 1999 [49] | Unclear | Low |  | Low | Low |  | Unclear | Low |  | High | 4 |
| Christensen, 2000 [26] | Low | Low |  | Low | Low |  | Low | Low |  | Low | 7 |
| Nzerue, 2000 [25] | High | Low |  | Low | Low |  | Unclear | Low |  | Low | 5 |
| Serra, 2002 [27] | High | Low |  | Low | Low |  | Unclear | Low |  | Low | 5 |
| Wong, 2002 [28] | Low | Low |  | Low | Low |  | Low | Low |  | Low | 7 |
| Li, 2003 [29] | High | High |  | Low | Unclear |  | Unclear | Low |  | Low | 3 |
| Moger, 2005 [53] | High | Low |  | Low | Unclear |  | Unclear | Low |  | Low | 4 |
| Tone, 2005 [30] | Unclear | Low |  | Low | Low |  | Unclear | Low |  | High | 4 |
| Soni, 2006 [54] | Unclear | Low |  | Low | Unclear |  | Unclear | Low |  | Low | 4 |
| Pham, 2007 [51] | Unclear | Low |  | Low | Unclear |  | Unclear | Low |  | Low | 4 |
| Akimoto, 2008 [50] | Unclear | Low |  | Low | Low |  | Unclear | Low |  | Low | 5 |
| Zhou, 2008 [31] | Low | High |  | Low | Unclear |  | High | Low |  | Low | 4 |
| Lin, 2009 [32] | Unclear | Low |  | Low | Low |  | Unclear | Low |  | Low | 5 |
| Mou, 2010 [12] | High | Low |  | Low | Low |  | Unclear | Low |  | Low | 5 |
| Bi, 2011 [52] | Low | Low |  | Low | Low |  | Unclear | Low |  | Low | 6 |
| Chang, 2011 [33] | High | Low |  | Low | Low |  | Unclear | Low |  | Low | 5 |
| Chong, 2012 [55] | Low | Low |  | Low | Unclear |  | Unclear | Low |  | High | 4 |
| Oh, 2012 [34] | Unclear | Low |  | Low | Low |  | Unclear | Low |  | High | 4 |
| Byun, 2013 [35] | Unclear | Low |  | Low | Low |  | Unclear | Low |  | Low | 5 |
| Harada, 2013 [36] | Unclear | Low |  | Low | Low |  | Unclear | Low |  | Low | 5 |
| Jin Kim, 2013 [37] | Low | Low |  | Low | Unclear |  | Unclear | Low |  | High | 4 |
| Wilfred, 2013 [56] | High | Low |  | Low | Unclear |  | Low | Low |  | Low | 5 |
| Horvatic, 2014 [38] | Low | Low |  | Low | Low |  | Unclear | Low |  | Low | 6 |
| Liu, 2014 [13] | Unclear | High |  | Low | Unclear |  | High | Low |  | Low | 3 |
| Pallayova, 2015 [39] | Unclear | High |  | Low | Unclear |  | Unclear | Low |  | Low | 3 |
| Soleymanian, 2015 [40] | Unclear | Low |  | Low | Low |  | Unclear | Low |  | Low | 5 |
| Wagrowska-D, 2015 [41] | Unclear | Low |  | Low | Unclear |  | Unclear | Low |  | Low | 4 |
| Yenigun, 2015 [57] | Unclear | Low |  | Low | Low |  | Unclear | Low |  | Low | 5 |
| Bermejo, 2016 [42] | Low | Low |  | Low | Unclear |  | Unclear | Low |  | Low | 5 |
| Dong, 2016 [14] | High | High |  | Low | Low |  | High | Low |  | Low | 4 |
| Liu, 2016 [58] | Unclear | Low |  | Low | Unclear |  | High | Low |  | Low | 4 |
| Erdogmus, 2017 [59] | High | Low |  | Low | Unclear |  | Unclear | Low |  | Low | 4 |
| Kanodia, 2017 [60] | Unclear | Low |  | Low | Low |  | High | Low |  | Low | 5 |
| Lee, 2017 [43] | Unclear | Low |  | Low | Low |  | Unclear | Low |  | Low | 5 |
| Li, 2017 [44] | High | Low |  | Low | Unclear |  | Unclear | Low |  | Low | 4 |
| Mami, 2017 [61] | Unclear | Low |  | Low | Low |  | Unclear | Low |  | Low | 5 |
| Tan, 2017 [45] | Low | Low |  | Low | Unclear |  | Low | Low |  | High | 5 |
| Xu, 2017 [46] | Unclear | Low |  | Low | Unclear |  | Unclear | Low |  | High | 3 |
| Fan, 2018 [47] | Unclear | Low |  | Low | Low |  | Unclear | Low |  | Low | 5 |
| Note: The risk of bias and applicability concerns were rated as low, high and unclear risk.  QUADAS-2, Quality Assessment of Diagnostic Accuracy Studies Tool-2. | | | | | | | | | | | |
